# Supplementary material for: PT320, a Sustained-Release GLP-1 Receptor Agonist, Ameliorates L-DOPA-Induced Dyskinesia in a Mouse Model of Parkinson’s Disease
Source: MDPI journal article supplement (doi:10.3390/ijms24054687), 2023-02-28
Supplement: s1 [file s1]

# **Supplementary**

**PT320, Sustained-Release GLP-1 Agonist, ameliorates L-DOPA-Induced Dyskinesia in a Mouse Model of Parkinson's Disease**

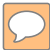

|                               | 1                                                                                                                     | 2                                                                                                                       | 3                                                                                                        | 4                                                                                                                                                      |
|-------------------------------|-----------------------------------------------------------------------------------------------------------------------|-------------------------------------------------------------------------------------------------------------------------|----------------------------------------------------------------------------------------------------------|--------------------------------------------------------------------------------------------------------------------------------------------------------|
| <b>Axial</b>                  | Sustained deviation of head/neck by at least 30°                                                                      | Sustained deviation of head/neck by at least 60°                                                                        | Torsion of neck/upper trunk by at least 90°                                                              | Torsion of neck/upper trunk by >90° causing the mouse to lose balance                                                                                  |
| <b>Limb</b>                   | Tiny displacement of the forepaw around a fixed position                                                              | Larger movement causing visible displacement of the whole forelimb, usually to/from snout.                              | Large displacement of the whole forelimb with visible engagement of shoulder muscles                     | Vigorous limb displacement, crossing over the midline of the body                                                                                      |
| <b>Abnormal paw movements</b> | Mice stood on both hind paws, with one front paw moving repeatedly up and down along the surface of the cylinder wall | Mice stood on both hind paws, with both front paws moving repeatedly up and down along the surface of the cylinder wall | Mice stood on their hind paws and repeatedly touched the surface of the cylinder wall with one hind paw. | Mice stood on their hind Paws close to the wall of the cylinder moving both front paws as noted above and repeatedly lifting the hind paws up and down |
| <b>Standing</b>               | Keep standing 1~5 seconds                                                                                             | Keep standing 6~10 seconds                                                                                              | Keep standing 11~15 seconds                                                                              | Keep standing > 20 seconds                                                                                                                             |

## Supplementary Figure S1.



A

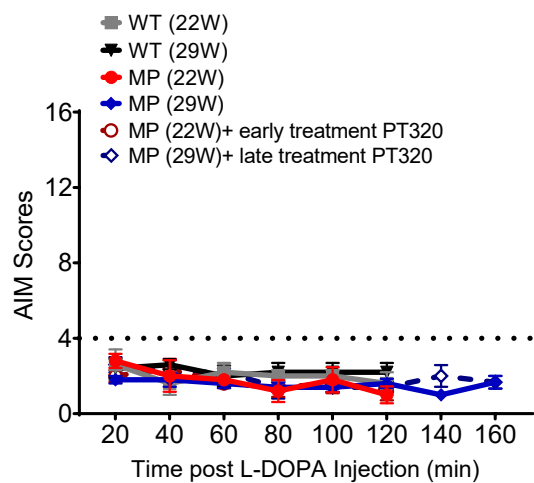

B

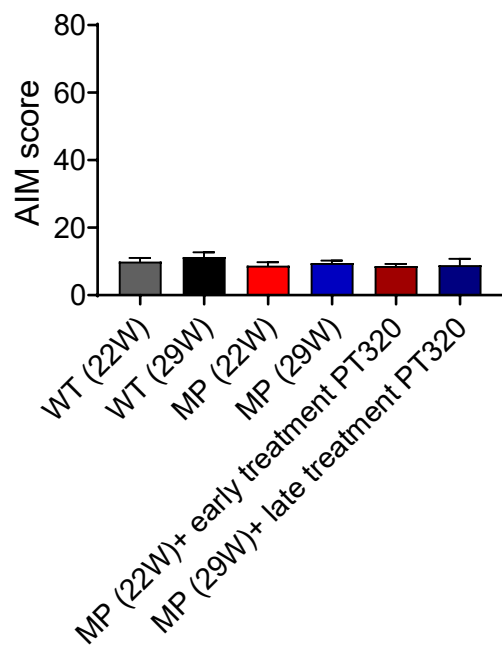

**Supplementary Figure S2.**

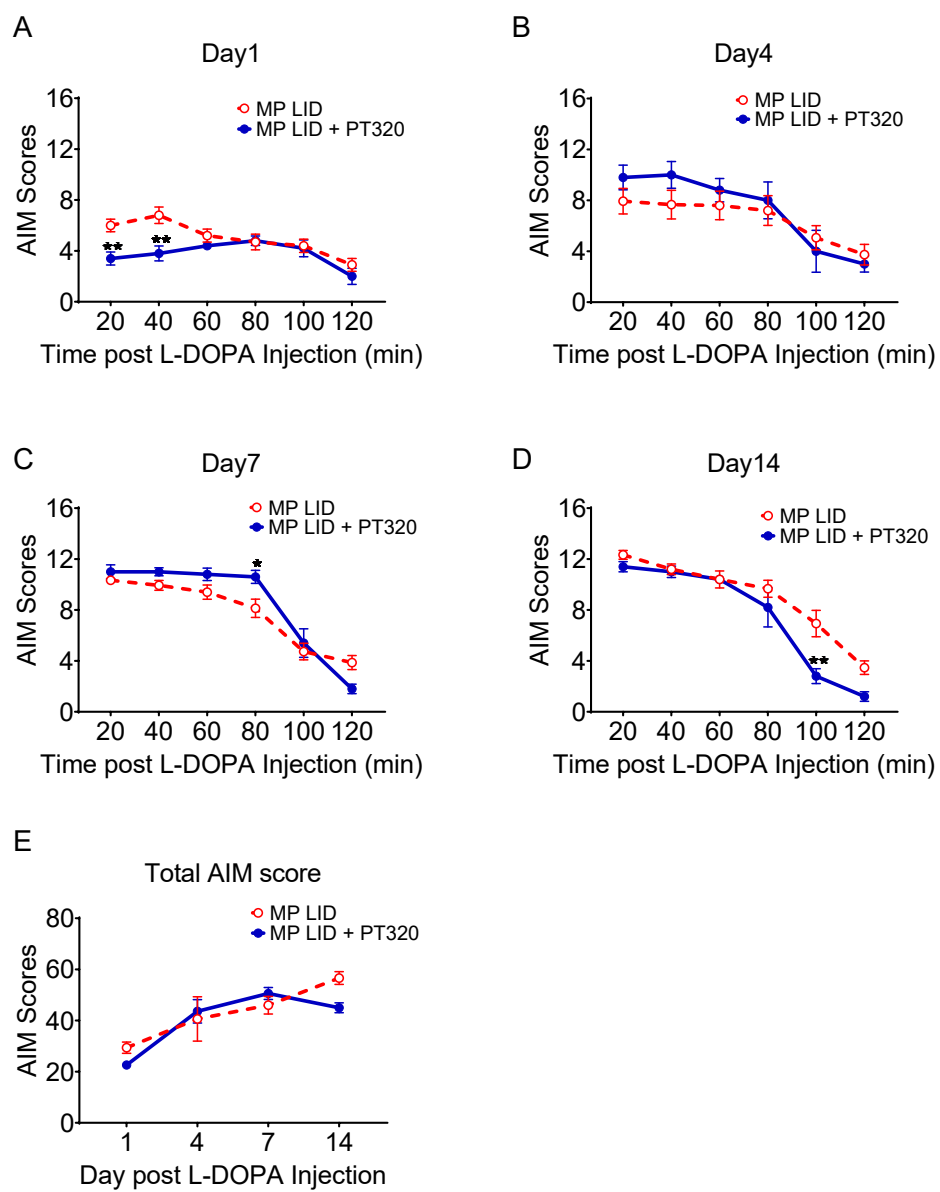

**Supplementary Figure S3.**

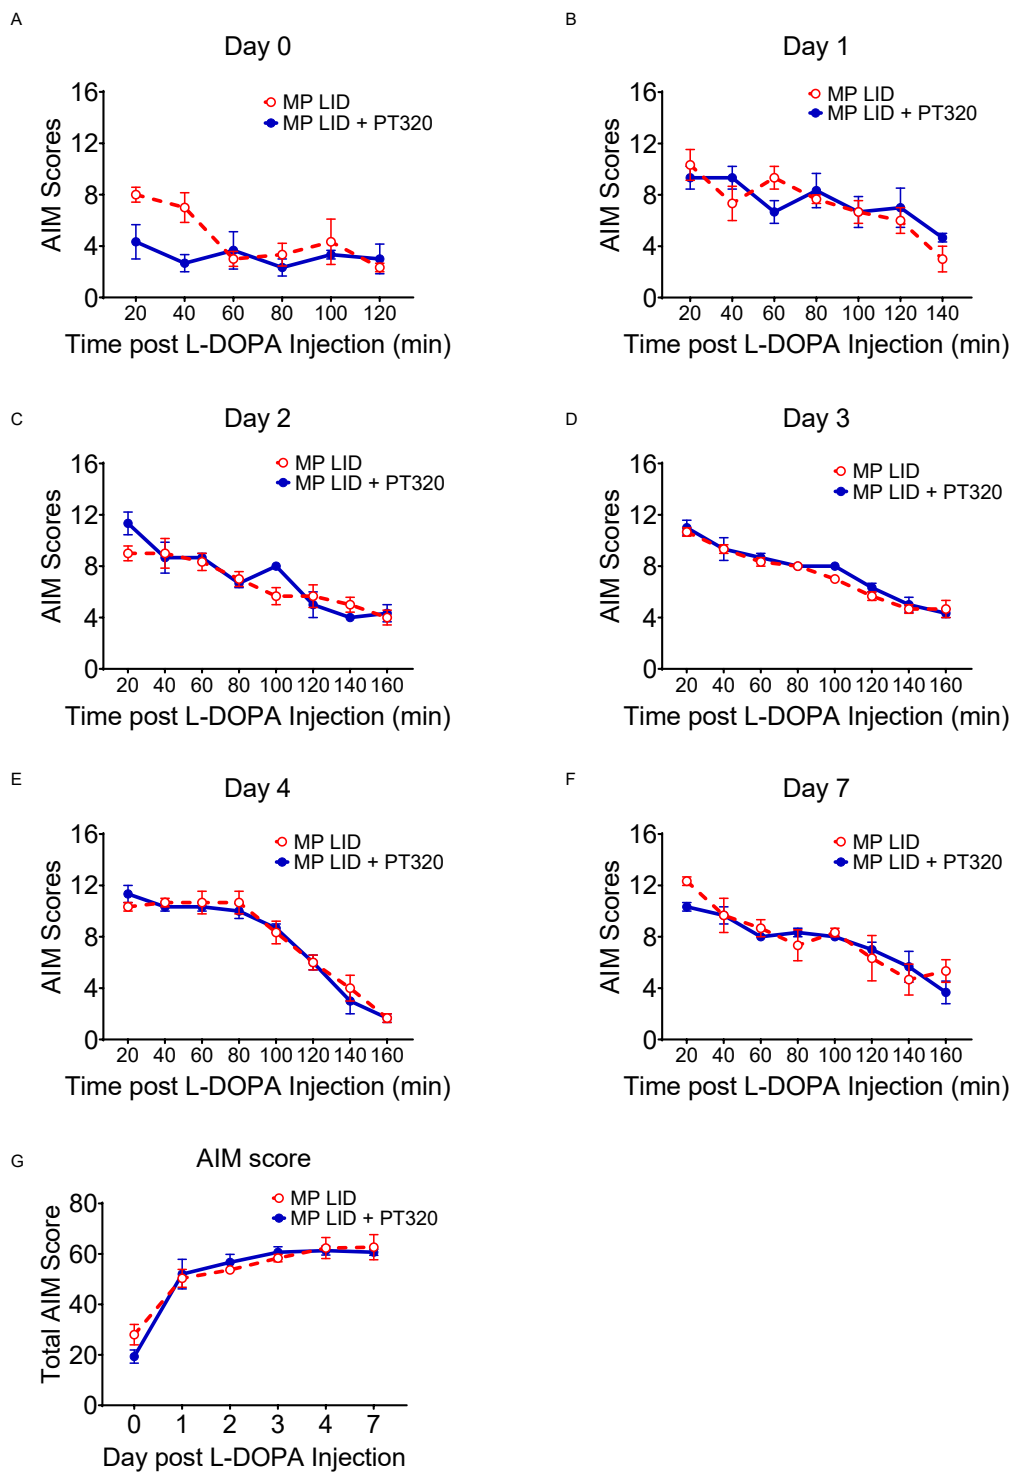

**Supplementary Figure S4**
